# Supplementary material
Source: publisher site journal article supplement (https://www.dovepress.com/article/455791)
Supplement: Supplementary file 1 [file get_supplementary_file.php]

**Patient experience with the SensoReady® autoinjector pen versus a comparator device: Results from a Canadian patient survey in rheumatoid arthritis and Crohn’s disease**

**Supplement 1: Questions asked during the survey**

- How long have you been administering Hyrimoz for your RA or CD with an autoinjector SensoReady pen?
- I have an array of attributes (characteristics) that I would like to share with you regarding RA or CD medication autoinjector pens. These are features such as functionality, usability, etc. Please rate the importance of each feature in an autoinjector pen in GENERAL, using a scale of 1–10 where 1 is not at all important and 10 is extremely important to you.

|     | <b>Array of attributes of autoinjector pens <u>in general</u></b> | <b>Importance rating scale<br/>(1 Not at all Important –<br/>10 Extremely Important)</b> |
|-----|-------------------------------------------------------------------|------------------------------------------------------------------------------------------|
| 1.  | Ability to use independently                                      |                                                                                          |
| 2.  | Ease of performing the self-injection with the pen                |                                                                                          |
| 3.  | Ease of preparation and set-up                                    |                                                                                          |
| 4.  | Ease of learning to use                                           |                                                                                          |
| 5.  | Simple/self-explanatory                                           |                                                                                          |
| 6.  | Easy to grip the pen                                              |                                                                                          |
| 7.  | Visual feedback                                                   |                                                                                          |
| 8.  | Time taken to complete injection                                  |                                                                                          |
| 9.  | Audible feedback                                                  |                                                                                          |
| 10. | Right size of the pen                                             |                                                                                          |
| 11. | Storage requirements                                              |                                                                                          |
| 12. | Injection needle is concealed                                     |                                                                                          |
| 13. | Process required to initiate                                      |                                                                                          |
| 14. | Convenient shape                                                  |                                                                                          |
| 15. | Pen is reusable                                                   |                                                                                          |
| 16. | Pen is for one-time use                                           |                                                                                          |
| 17. | Weight of pen                                                     |                                                                                          |

- Please rate how well your **Humira autoinjector pen** performed on each attribute. Using a scale of 1–10 where a score of 1 implies the **Humira autoinjector pen** performed poorly and a score of 10 indicates the **Humira autoinjector pen** performed extremely well, assign a score to each attribute below.

|     | <b>Array of attributes of the <u>Humira</u> autoinjector pens</b> | <b>Performance rating scale<br/>(1 Not at all Important –<br/>10 Extremely Important)</b> |
|-----|-------------------------------------------------------------------|-------------------------------------------------------------------------------------------|
| 1.  | Ability to use independently                                      |                                                                                           |
| 2.  | Ease of performing the self-injection with the pen                |                                                                                           |
| 3.  | Ease of preparation and set-up                                    |                                                                                           |
| 4.  | Ease of learning to use                                           |                                                                                           |
| 5.  | Simple/self-explanatory                                           |                                                                                           |
| 6.  | Easy to grip the pen                                              |                                                                                           |
| 7.  | Visual feedback                                                   |                                                                                           |
| 8.  | Time taken to complete injection                                  |                                                                                           |
| 9.  | Audible feedback                                                  |                                                                                           |
| 10. | Right size of the pen                                             |                                                                                           |
| 11. | Storage requirements                                              |                                                                                           |
| 12. | Injection needle is concealed                                     |                                                                                           |
| 13. | Process required to initiate                                      |                                                                                           |
| 14. | Convenient shape                                                  |                                                                                           |
| 15. | Weight of pen                                                     |                                                                                           |

- Please rate how well the **Hyrimoz Autoinjector SensoReady pen** performs on each attribute. Using a scale of 1–10 where a score of 1 implies the **Hyrimoz Autoinjector SensoReady pen** performed poorly and a score of 10 indicates the **Hyrimoz Autoinjector SensoReady pen** performed extremely well, assign a score to each attribute below.

|     | <b>Array of attributes of the <u>Hyrimoz</u> autoinjector pens</b> | <b>Performance rating scale<br/>(1 Not at all Important –<br/>10 Extremely Important)</b> |
|-----|--------------------------------------------------------------------|-------------------------------------------------------------------------------------------|
| 1.  | Ability to use independently                                       |                                                                                           |
| 2.  | Ease of performing the self-injection with the pen                 |                                                                                           |
| 3.  | Ease of preparation and set-up                                     |                                                                                           |
| 4.  | Ease of learning to use                                            |                                                                                           |
| 5.  | Simple/self-explanatory                                            |                                                                                           |
| 6.  | Easy to grip the pen                                               |                                                                                           |
| 7.  | Visual feedback                                                    |                                                                                           |
| 8.  | Time taken to complete injection                                   |                                                                                           |
| 9.  | Audible feedback                                                   |                                                                                           |
| 10. | Right size of the pen                                              |                                                                                           |
| 11. | Storage requirements                                               |                                                                                           |
| 12. | Injection needle is concealed                                      |                                                                                           |
| 13. | Process required to initiate                                       |                                                                                           |
| 14. | Convenient shape                                                   |                                                                                           |
| 15. | Weight of pen                                                      |                                                                                           |

- Do you find it helpful to have the viewing window on your **Hyrimoz Autoinjector SensoReady pen** in order to get **visual feedback during the injection**?
- Is the **size** of the **viewing window** helpful on your **Hyrimoz Autoinjector SensoReady pen**?
- Is the **color indicator** helpful on your **Hyrimoz Autoinjector SensoReady pen**?
- Is the **buttonless activation** helpful when using your **Hyrimoz Autoinjector SensoReady pen**?
- Thinking of the two autoinjector pens, your previous **Humira autoinjector pen** and your current **Hyrimoz autoinjector SensoReady pen**, I'd like to discuss some questions about your preference. For each feature below, please indicate which autoinjector pen performs best. Please provide your answer for each attribute. You may only select one pen per attribute.

|     | Array of attributes of the <b><u>Hyrimoz</u></b> autoinjector pens | Performance rating scale<br>Which one performs better?<br>(Check one for each metric) |         |
|-----|--------------------------------------------------------------------|---------------------------------------------------------------------------------------|---------|
|     |                                                                    | Humira                                                                                | Hyrimoz |
| 1.  | Ability to use independently                                       |                                                                                       |         |
| 2.  | Ease of performing the self-injection with the pen                 |                                                                                       |         |
| 3.  | Ease of preparation and set-up                                     |                                                                                       |         |
| 4.  | Ease of learning to use                                            |                                                                                       |         |
| 5.  | Simple/self-explanatory                                            |                                                                                       |         |
| 6.  | Easy to grip the pen                                               |                                                                                       |         |
| 7.  | Visual feedback                                                    |                                                                                       |         |
| 8.  | Time taken to complete injection                                   |                                                                                       |         |
| 9.  | Audible feedback                                                   |                                                                                       |         |
| 10. | Right size of the pen                                              |                                                                                       |         |
| 11. | Storage requirements                                               |                                                                                       |         |
| 12. | Injection needle is concealed                                      |                                                                                       |         |
| 13. | Process required to initiate                                       |                                                                                       |         |
| 14. | Convenient shape                                                   |                                                                                       |         |
| 15. | Weight of pen                                                      |                                                                                       |         |

- Overall, which device would you prefer to use for your injections, the Humira pen or the Hyrimoz pen?

- Which autoinjector pen has a window that makes it easier for viewing the progress of your injection?
- Based on your experience with the **Hyrimoz autoinjector SensoReady pen**, please rate the likelihood to continue using the **Hyrimoz autoinjector SensoReady pen** for the next 6–12 months using a scale of 1–10 where 1 is not at all likely and 10 is extremely important to you?
